# Supplementary material for: CASE REPORT: Vocal acoustic characteristics of adenotonsillar hypertrophy and adenotonsillectomy in young child.
Source: Research Square preprint supplement (doi:10.21203/rs.3.rs-7173808/v1), 2025-07-25
Supplement: Supplementary file 1 [file 554c0ed4564d15241969af93.docx]

Table 1. Changes in the acoustic parameters.

|  | Parameters | Symbols | Time | BL | 1M | 3M | 6M | *p* value |
| --- | --- | --- | --- | --- | --- | --- | --- | --- |
| Fo parameters | | | | | | | | |
|  | Fo | Hz | AM | 272.97 ± 8.72 | 273.38 ± 13.04 | 303.41 ± 7.22 † | 299.07 ± 21.73 †  ‡‡‡ダブルたがー  ‡‡‡ | **0.0012** |
|  |  |  | PM | 268.38 ± 5.41 | 278.23 ± 16.41 | 303.98 ± 28.83 ‡ | 294.11 ± 17.24 ‡ | **0.0034** |
|  | STD | Hz | AM | 3.85 ± 0.68 | 3.71 ± 0.70 | 4.37 ± 0.88 | 4.13 ± 0.50 | 0.408 |
|  |  |  | PM | 4.12 ± 1.35 | 3.95 ± 0.89 | 3.56 ± 0.48 | 3.21 ± 0.75 | 0.601 |
| Frequency perturbation measurements | | | | | | | | |
|  | Jitt | % | AM | 0.55 ± 0.15 | 0.39 ± 0.14 | 0.41 ± 0.24 | 0.55 ± 0.09 | 0.112 |
|  |  |  | PM | 0.61 ± 0.16 | 0.53 ± 0.11 | 0.43 ± 0.21 | 0.46 ± 0.17 | 0.262 |
| Amplitude perturbation measurements | | | | | | | | |
|  | Shim | % | AM | 3.21 ± 0.89 | 3.04 ± 0.56 | 2.56 ± 0.35 | 2.71 ± 0.32 | 0.300 |
|  |  |  | PM | 3.65 ± 0.94 | 3.02 ± 0.59  . | 2.85 ± 0.84 | 2.66 ± 0.37 | 0.100 |
| Noise-related measurements | | | | | | | | |
|  | NHR |  | AM | 0.12 ± 0.01 | 0.11 ± 0.01 | 0.11 ± 0.01 | 0.11 ± 0.01 | 0.056 |
|  |  |  | PM | 0.13 ± 0.01 | 0.12 ± 0.01 | 0.11 ± 0.01 ‡ | 0.11 ± 0.01 ‡ | **0.0021** |
| Tremor-related measurements | | | | | | | | |
|  | FTRI | % | AM | 0.35 ± 0.25 | 0.33 ± 0.20 | 0.21 ± 0.15 | 0.28 ± 0.11 | NaN |
|  |  |  | PM | 0.42 ± 0.17 | 0.49 ± 0.16 | 0.27 ± 0.16 | 0.30 ± 0.04 | NaN |
|  | ATRI | % | AM | 6.45 ± 5.38 | 4.88 ± 4.07 | 3.19 ± 2.49 | 4.00 ± 1.93 | NaN |
|  |  |  | PM | 4.95 ± 1.79 | 3.64 ± 1.87 | 4.17 ± 5.58 | 2.82 ± 1.16 | NaN |
| Subharmonic component-related measurements | | | | | | | | |
|  | DSH | % | AM | 0.37 ± 0.42 * | 0.10 ± 0.22 | 0.20 ± 0.45 | 0.10 ± 0.23 | 0.429 |
|  |  |  | PM | 1.59 ± 1.15 | 0.00 ± 0.00 ‡ | 0.20 ± 0.28 ‡ | 0.00 ± 0.00 ‡ | **0.0009** |
| Voice irregularity-related measurements | | | | | | | | |
|  | DUV | % | AM | 0.00 ± 0.00 | 0.00 ± 0.00 | 0.00 ± 0.00 | 0.00 ± 0.00 | NaN |
|  |  |  | PM | 0.07 ± 0.22 | 0.00 ± 0.00 | 0.00 ± 0.00 | 0.00 ± 0.00 | 0.682 |

Values are mean ± SD; BL, Base line; M, months after surgery; NaN, not a number; *p* value by Kruskal-Wallis test.

†*p* < 0.05, Significant longitudinal changes in AM assessments using Steel *post-hoc* test (compared to BL data); ‡ *p* < 0.05, Significant longitudinal changes in PM assessments using Steel *post-hoc* test (compared to BL data), * *p* < 0.05; Significant difference between AM and PM assessments, Mann-Whitney U-test (compared to PM data).
