# Supplementary material for: CASE REPORT: Vocal acoustic characteristics of adenotonsillar hypertrophy and adenotonsillectomy in young child.
Source: Research Square preprint supplement (doi:10.21203/rs.3.rs-7173808/v1), 2025-07-25
Supplement: Supplementary file 2 [file f3572406257f7c20eaf745a1.docx]

1) **Yasuhiro Tanaka**; Ph.D

a Department of Health Sciences, Faculty of Health Sciences, Aichi Gakuin University

12 Araike, Iwasaki-cho, Nissin, Aichi, 4700195, JAPAN

b Department of neurology, Nagoya University graduate School of Medicine

65 Tsurumai-cho, Showa-ku, Nagoya, Aichi, 4668550, JAPAN

**E-mail:** yas_tnk_119-aboy2024@yahoo.co.jp

2) **Mayu Tanaka** B.A.b,

b Department of neurology, Nagoya University graduate School of Medicine

65 Tsurumai-cho, Showa-ku, Nagoya, Aichi, 4668550, JAPAN

**E-mail:** yas_84_power_1979@yahoo.co.jp

**Corresponding author:**

**Yasuhiro TANAKA**

Department of Health Sciences, Faculty of Health Sciences, Aichi Gakuin University

12 Araike, Iwasaki-cho, Nissin, Aichi, 4700195, JAPAN

TEL: +81-561-73-1111, FAX: +81-561-73-1142,

E-mail: yas_tnk_119-aboy2024@yahoo.co.jp
